# Supplementary material
Source: PubMed Central journal article supplement (PMC3422430)
Supplement: NIHMS382472-supplement-supplement_1.pdf [file NIHMS382472-supplement-supplement_1.pdf]

## Supplemental data

Table I. Relative gene expression in WT *A. hydrophila* SSU and its mutants

| Strain                   | Gene        | Optical intensity of the bands* (x10 <sup>3</sup> ) | Fold Change Mutant / WT | P       |
|--------------------------|-------------|-----------------------------------------------------|-------------------------|---------|
| SSU                      | <i>qseB</i> | 28.52±0.63                                          |                         |         |
| $\Delta luxS$ mutant     | <i>qseB</i> | 29.01±0.67                                          | 1.0±0.001               | 0.14    |
| $\Delta ahyRI$ mutant    | <i>qseB</i> | 74.11±0.71                                          | 2.61±0.02               | < 0.001 |
| SSU:: <i>aha0701h</i>    | <i>qseB</i> | 79.84±0.41                                          | 2.80± 0.01              | < 0.001 |
| $\Delta ahyRI::aha0701h$ | <i>qseB</i> | 27.94±0.81                                          | 1.0±0.02                | 0.12    |
| SSU                      | <i>qseC</i> | 11.76±0.22                                          |                         |         |
| $\Delta luxS$ mutant     | <i>qseC</i> | 12.03±0.67                                          | 1.0±0.05                | 0.4     |
| $\Delta ahyRI$ mutant    | <i>qseC</i> | 25.11±0.71                                          | 2.21±0.02               | < 0.001 |
| SSU:: <i>aha0701h</i>    | <i>qseC</i> | 27.49±0.41                                          | 2.30± 0.01              | < 0.001 |
| $\Delta ahyRI::aha0701h$ | <i>qseC</i> | 13.17±0.81                                          | 1.0±0.02                | 0.38    |
| SSU                      | <i>ahyR</i> | 22.34±0.34                                          |                         |         |
| $\Delta qseB$ mutant     | <i>ahyR</i> | 11.51±0.44                                          | 0.51±0.02               | < 0.001 |
| $\Delta qseB::aha0701h$  | <i>ahyR</i> | 7.48± 0.23                                          | 0.33±0.009              | < 0.001 |
| $\Delta luxS$ mutant     | <i>ahyR</i> | 18.12±0.10                                          | 0.72±0.03               | < 0.001 |
| SSU:: <i>aha0701h</i>    | <i>ahyR</i> | 38.38±0.29                                          | 1.78±0.03               | < 0.001 |
| SSU                      | <i>ahyI</i> | 13.96±0.20                                          |                         |         |
| $\Delta qseB$ mutant     | <i>ahyI</i> | 6.66±0.45                                           | 0.47 ±0.05              | < 0.001 |
| $\Delta qseB::aha0701h$  | <i>ahyI</i> | 5.16±0.62                                           | 0.63± 0.02              | < 0.001 |
| $\Delta luxS$ mutant     | <i>ahyI</i> | 9.44±0.22                                           | 0.67±0.02               | < 0.001 |
| SSU:: <i>aha0701h</i>    | <i>ahyI</i> | 32.16±0.38                                          | 2.38±0.01               | < 0.001 |
| SSU                      | <i>luxS</i> | 20.63±0.27                                          |                         |         |
| $\Delta qseB$ mutant     | <i>luxS</i> | 21.22±0.12                                          | 1.02± 0.04              | 0.2     |
| $\Delta qseB::aha0701h$  | <i>luxS</i> | 20.18±0.48                                          | 1.00±0.01               | 0.15    |
| SSU                      | <i>vpsT</i> | 17.11±0.94                                          |                         |         |
| $\Delta qseB$ mutant     | <i>vpsT</i> | 10.69±0.27                                          | 0.62±0.05               | < 0.001 |
| $\Delta qseB::aha0701h$  | <i>vpsT</i> | 16.92±0.49                                          | 1.0±0.08                | 0.35    |
| SSU                      | <i>fleN</i> | 34.23±0.24                                          |                         |         |
| $\Delta qseB$ mutant     | <i>fleN</i> | 58.18±0.33                                          | 1.74± 0.02              | < 0.001 |
| $\Delta qseB::aha0701h$  | <i>fleN</i> | 22.66±0.29                                          | 0.66± 0.07              | < 0.001 |

Values are means  $\pm$  standard deviations (SD) from triplicate experiments. The ratio of Mutant/WT was calculated for each 31 pairs, and ANOVA was used to calculate the mean  $\pm$  SD and the significance of the differences.

\* The RT-PCR products contained in the gels were scanned in an image acquisition and analysis system (GEL-DOC 2000, Bio-Rad, Hercules, CA), and optical intensity was quantified with the AlphaEasyFC software (AlphaInnotech, San Leandro, CA).
